# Supplementary material
Source: ML conference proceedings conference paper supplement (https://openaccess.thecvf.com/content/cvpr_2016/html/Sekii_Robust_Real-Time_3D_2016_CVPR_paper.html)
Supplement: Supplementary file 2 [file Sekii_Robust_Real-Time_3D_2016_CVPR_supplemental.zip]

Archive with 3 entries (3 files):
- 0678-supp/Additional_Results.url
- 0678-supp/Notations.pdf
- 0678-supp/Tracking_Result.avi
