# Supplementary material
Source: ML conference proceedings conference paper supplement (https://openaccess.thecvf.com/content/cvpr_2016/html/Sekii_Robust_Real-Time_3D_2016_CVPR_paper.html)
Supplement: Supplementary file 2 [file Sekii_Robust_Real-Time_3D_2016_CVPR_supplemental.zip › 0678-supp/Additional_Results.url]

[InternetShortcut]
URL=https://youtu.be/UTNpraTuMtw
